# Supplementary material for: Adoptive Transfer of EBV Specific CD8+ T Cell Clones Can Transiently Control EBV Infection in Humanized Mice
Source: PubMed Central journal article supplement (PMC4148450; doi:10.1371/journal.ppat.1004333), 2014-08-28

Figure S3

A

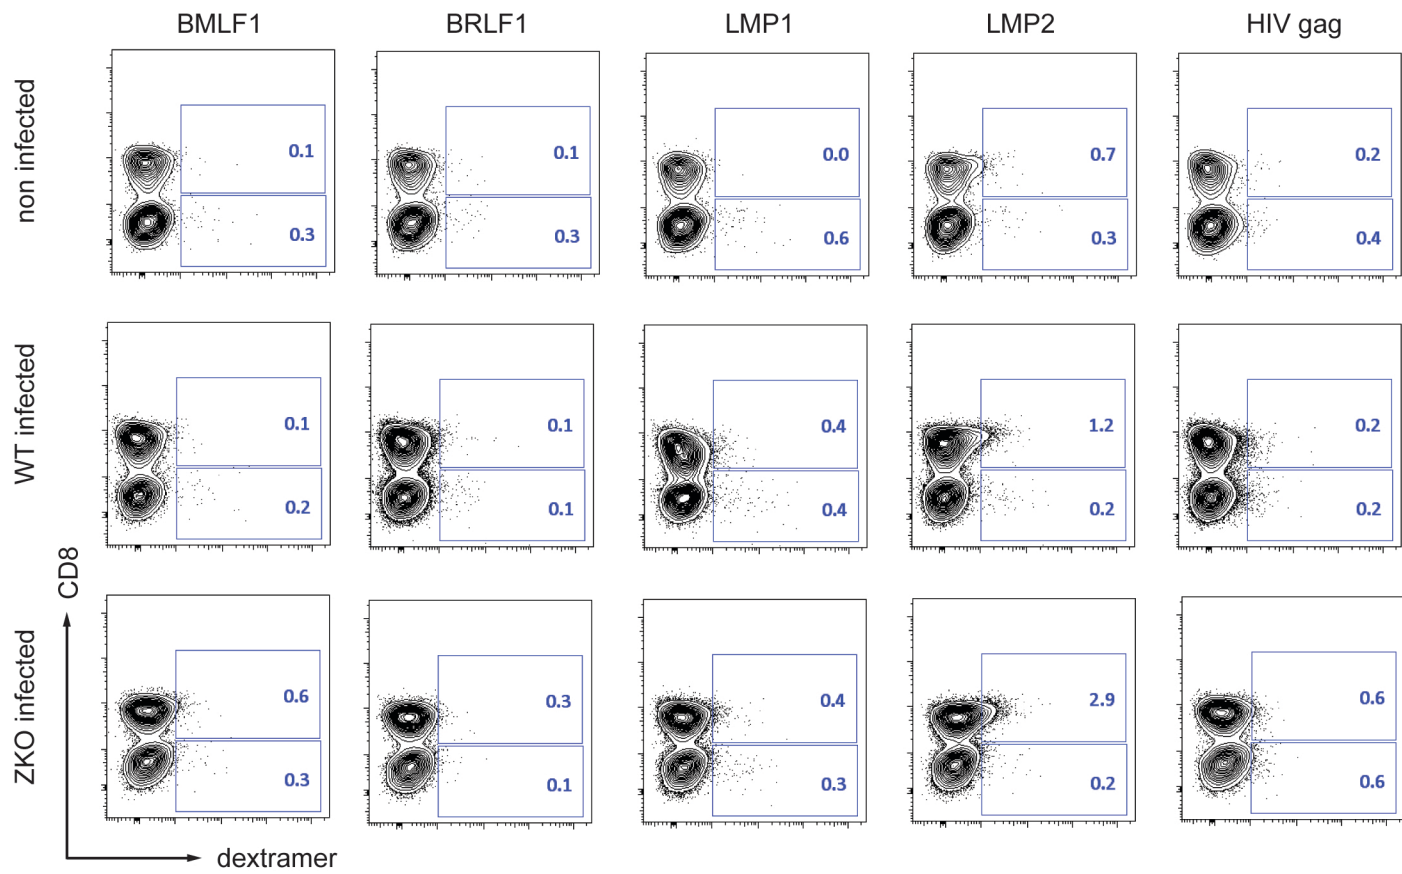

B

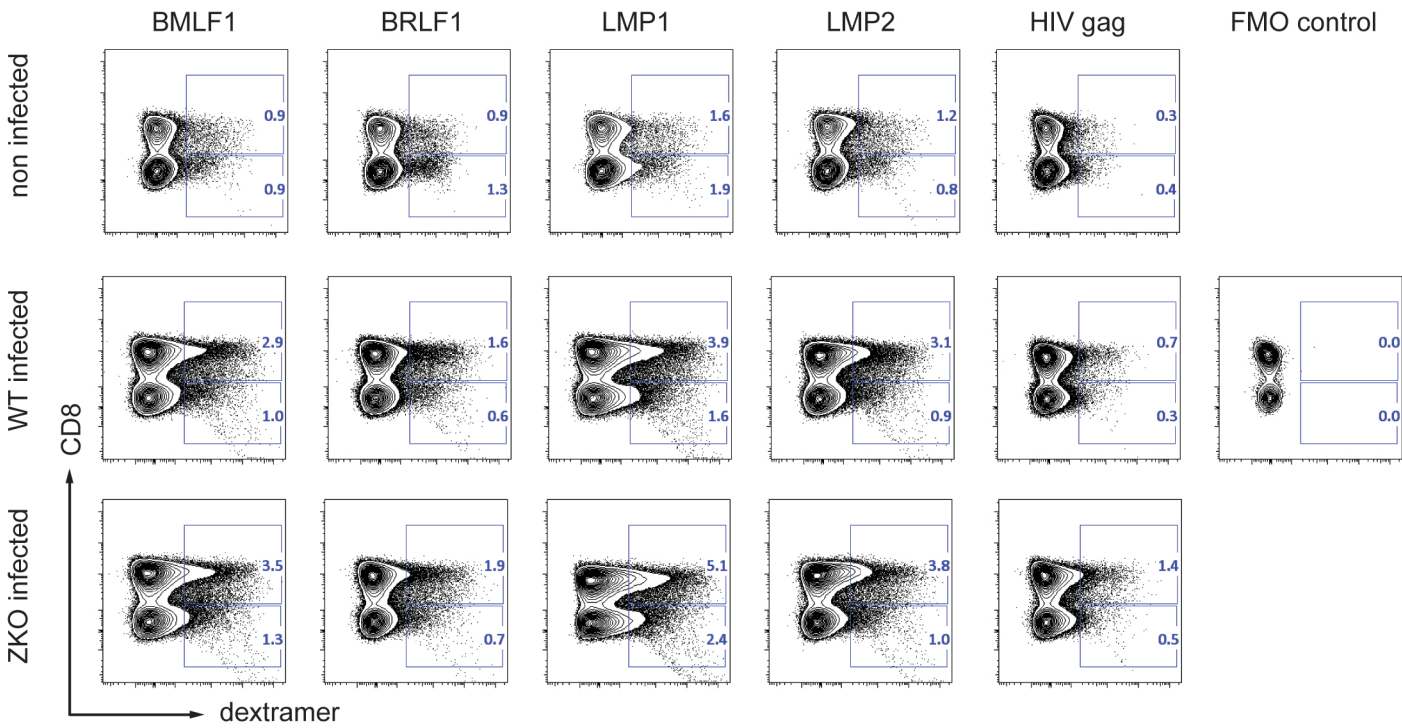

Supplement: ppat.1004333.s003.pdf [file ppat.1004333.s003.pdf]
